# Supplementary material for: Post-fertilization transcription initiation in an ancestral LTR retrotransposon drives lineage-specific genomic imprinting of ZDBF2
Source: eLife. 2025 Jun 2;13:RP94502. doi: 10.7554/eLife.94502 (PMC12129452; doi:10.7554/eLife.94502)
Supplement: Supplementary file 1. [file elife-94502-supp1.xlsx]

## Sheet: Supplemental file 1
Supplementary file 1. Imprinted expression patterns of GPR1-AS and ZDBF2 among mammalian species.
Allelic expression (Gene)	Human	Rhesus macaque	Rabbit	Mouse	Rat	Cow	Tammar wallaby
Bi-allelic (ZDBF2*)	Placenta			Placenta (E15.5, E17.5)		Embryonic disc (E14)	Brain, Lung, Liver,
				Testis (E15.5)		Trophectoderm (E14)	Skin, Kidney, Heart,
				Ovary (E17.5)		Liver, Placenta	Muscle, Spleen, Ovary
Imprinted (ZDBF2*)	Lymphocyte (Blood tissues)	Lymphocyte (Blood tissues)	Lymphocyte (Blood tissues)	Embryo (E9.0)
				Embryonic brain (E15.5)	Epiblast (E8.5)
				Multiple tissues	Ectoplacental cone (E8.5)
				(E8.5, E17.5, 3dpp, 60dpp)
Imprinted (GPR1-AS/Liz)	Placenta			Blastocyst (E3.5)	Unknown	Not detected	Not detected
				Embryo (E3.5 to E7.5)
				Ectoplacental cone (E9.5)
				Placenta (E15.5)
References		In this study	In this study	Kobayashi et al. 2009	Albert et al. 2023	In this study	In this study
	Kobayashi et al. 2009			Kobayashi et al. 2012
	Kobayashi et al. 2013			Kobayashi et al. 2013
				Duffie et al. 2014
Note: *3'UTR of Zdbf2 is indistinguishable between Zdbf2 and Liz in mice.
