# Supplementary material for: Post-fertilization transcription initiation in an ancestral LTR retrotransposon drives lineage-specific genomic imprinting of ZDBF2
Source: eLife. 2025 Jun 2;13:RP94502. doi: 10.7554/eLife.94502 (PMC12129452; doi:10.7554/eLife.94502)
Supplement: Supplementary file 3. [file elife-94502-supp3.xlsx]

## Sheet: Supplemental file 3
Supplementary file 3. Primers used in this study.
Primer name	Sequence	Annealing Tm
bZDBF2F11 (for bovine SNP1&2)	CATAGCTTTCCTAACTGGTGGA	64ºC
bZDBF2R11 (for bovine SNP1&2)	TGCCACATTCATCCTTGCAG
bZDBF2F8 (for bovine SNP3)	GGACACTGGTTGTGCTGATACA	64ºC
bZDBF2R8-2 (for bovine SNP3)	TGTCCATAACATACCCACAGGCTA
wZDBF2F (for tammar wallaby)	GATGCCCCATTTGAATCAGT	57ºC
wZDBF2R (for tammar wallaby)	GCCTCCTTCCTTTTCCAGAT
rheZDBF2F3 (for rhesus macaque)	CAGTTTGAGTCTGGGATACTCAG	64ºC
rheZDBF2R3 (for rhesus macaque)	ATCAGTACAGCACTGTACTTCTATG
oryZDBF2F1 (for rabbit)	GACATTCTTCCAGTGTAAGTTTGAA	64ºC
oryZDBF2R1 (for rabbit)	GTGCTACTCATAGCCCTAGTTAC
*Liz_Up_NheI_F1 (for mouse)	agctagcGTGATATATCTCAGTAGGTT	64ºC
*Liz_Ex_NheI_F1 (for mouse)	agctagcATCTCCTCTTCATCGCATCT
*Liz_Up_HindIII_R1 (for mouse)	tcaagcttAGATGCGATGAAGAGGAGAT
*Liz_Ex_HindIII_R1 (for mouse)	tcaagcttAGGTTTATCGTGAAGGCCGA
*GPR1-AS_Up_NheI_F1 (for human)	agctagcTTTCCTATTGCGGACACCTC	64ºC
*GPR1-AS_Ex_NheI_F1 (for human)	agctagcGCATTCATTACAAATCGTGT
*GPR1-AS_Up_HindIII_F1 (for human)	tcaagcttATGAATGCAAGACACCGGTG
*GPR1-AS_Ex_HindIII_F1 (for human)	tcaagcttCAAGACTGCAGGTTTACTAC
†GPR1-AS_Nested_F1 (for human)	ACACCGGTGTCTTGCATTCA
†GPR1-AS_Nested_R1 (for human)	TTAGTATCTATGCTGGGCTGAG
*Sequences added for restriction enzyme digestion, including recognition sites (NheI or HindIII), are indicated in lowercase letters.
†Because the first exon of GPR1-AS overlaps with MER21C-LTR, nested PCR (using primers located outside the exon) is required when amplifying the exon sequence with primers designed within the exon.
